# Supplementary material
Source: bioRxiv or medRxiv preprint supplement (https://www.medrxiv.org/highwire/filestream/73448/field_highwire_adjunct_files/0/2020.03.09.20033043-1.pdf)

# CD vs non-CD DMR 1

chr7:51538650-51539678

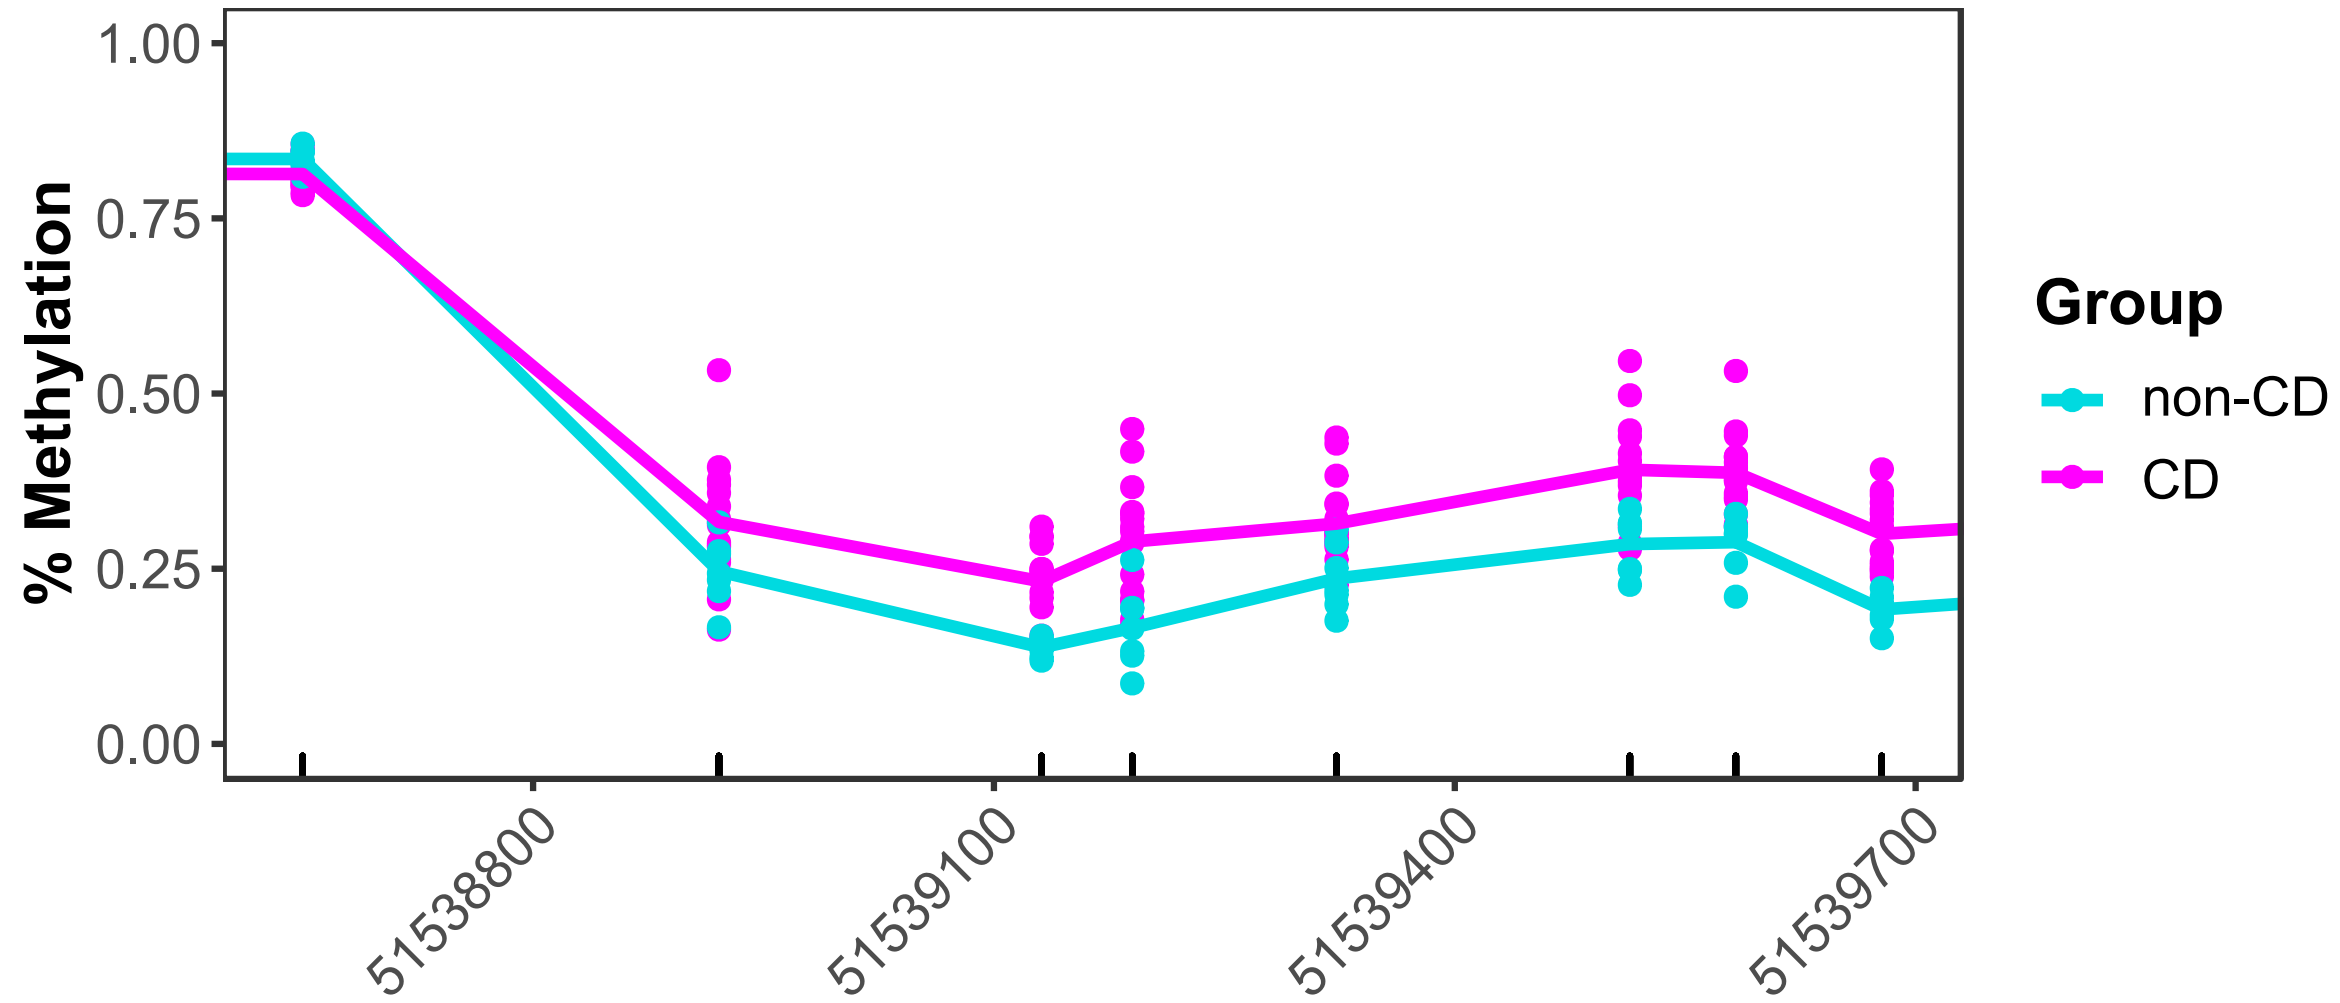

Supplement: Supplementary file [file 2020.03.09.20033043-1.pdf]
